# Supplementary material for: Clearance of heparan sulfate in the brain prevents neurodegeneration and neurocognitive impairment in MPS II mice
Source: PubMed Central journal article supplement — Mol Ther. 2021 Jan 26;29(5):1853–61. doi: 10.1016/j.ymthe.2021.01.027 (PMC8116601; doi:10.1016/j.ymthe.2021.01.027), 2021-01-26
Supplement: mmc1.pdf [file mmc1.pdf]

## **Supplemental Information**

### **Clearance of heparan sulfate in the brain prevents neurodegeneration and neurocognitive impairment in MPS II mice**

**Hideto Morimoto, Sachiho Kida, Eiji Yoden, Masafumi Kinoshita, Noboru Tanaka, Ryuji Yamamoto, Yuri Koshimura, Haruna Takagi, Kenichi Takahashi, Tohru Hirato, Kohtaro Minami, and Hiroyuki Sonoda**

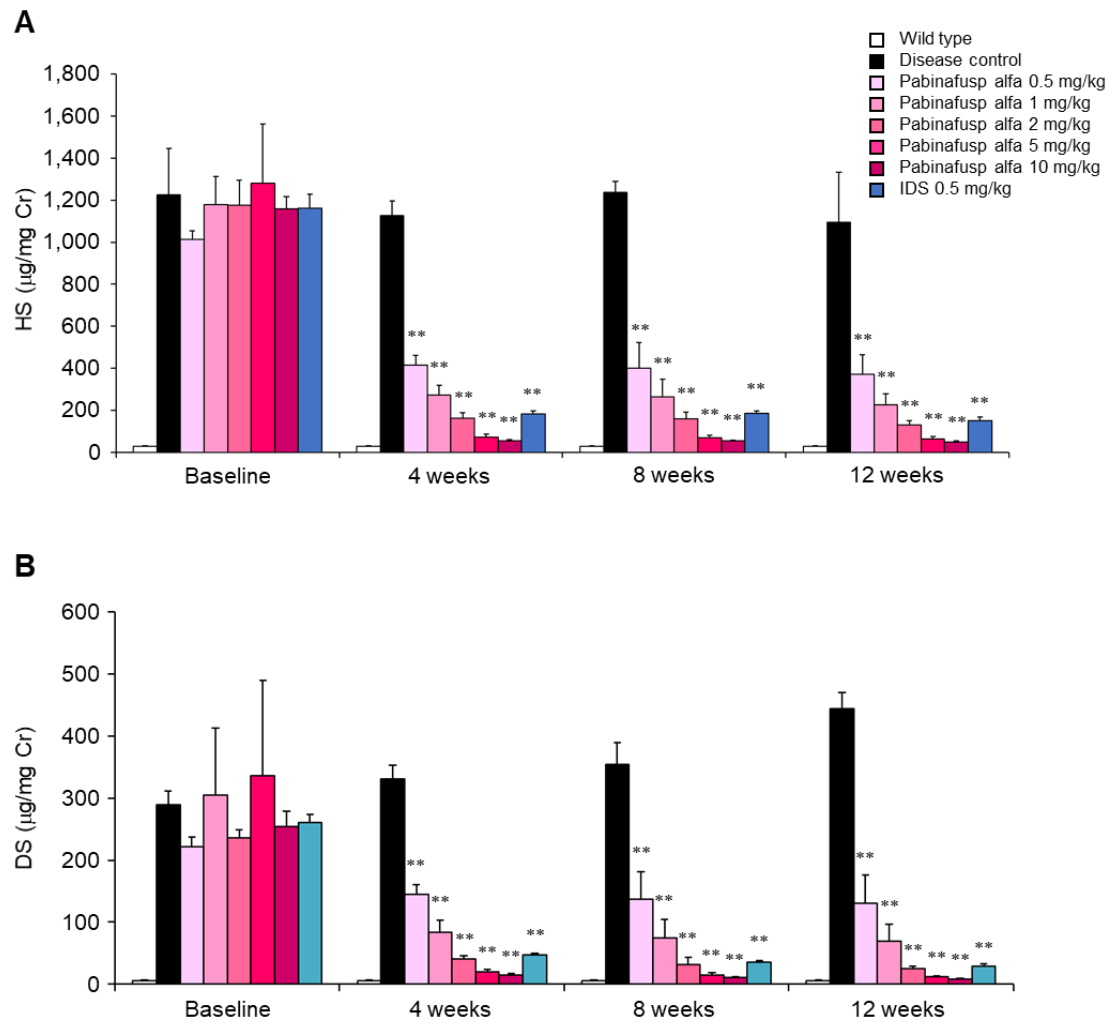

**Figure S1. Concentrations of heparan sulfate and dermatan sulfate in the urine during a 12-week repeated dose study of pabinafusp alfa or IDS.** Concentrations of heparan sulfate (HS, A) and dermatan sulfate (DS, B) are shown. Drugs were intravenously administered to 12-week-old MPS II mice once every week for 12 weeks. Values are expressed as mean with S.D. bars. Each group contains 5 animals.  $**P < 0.01$  (vs. Disease control group), Tukey-Kramer test.

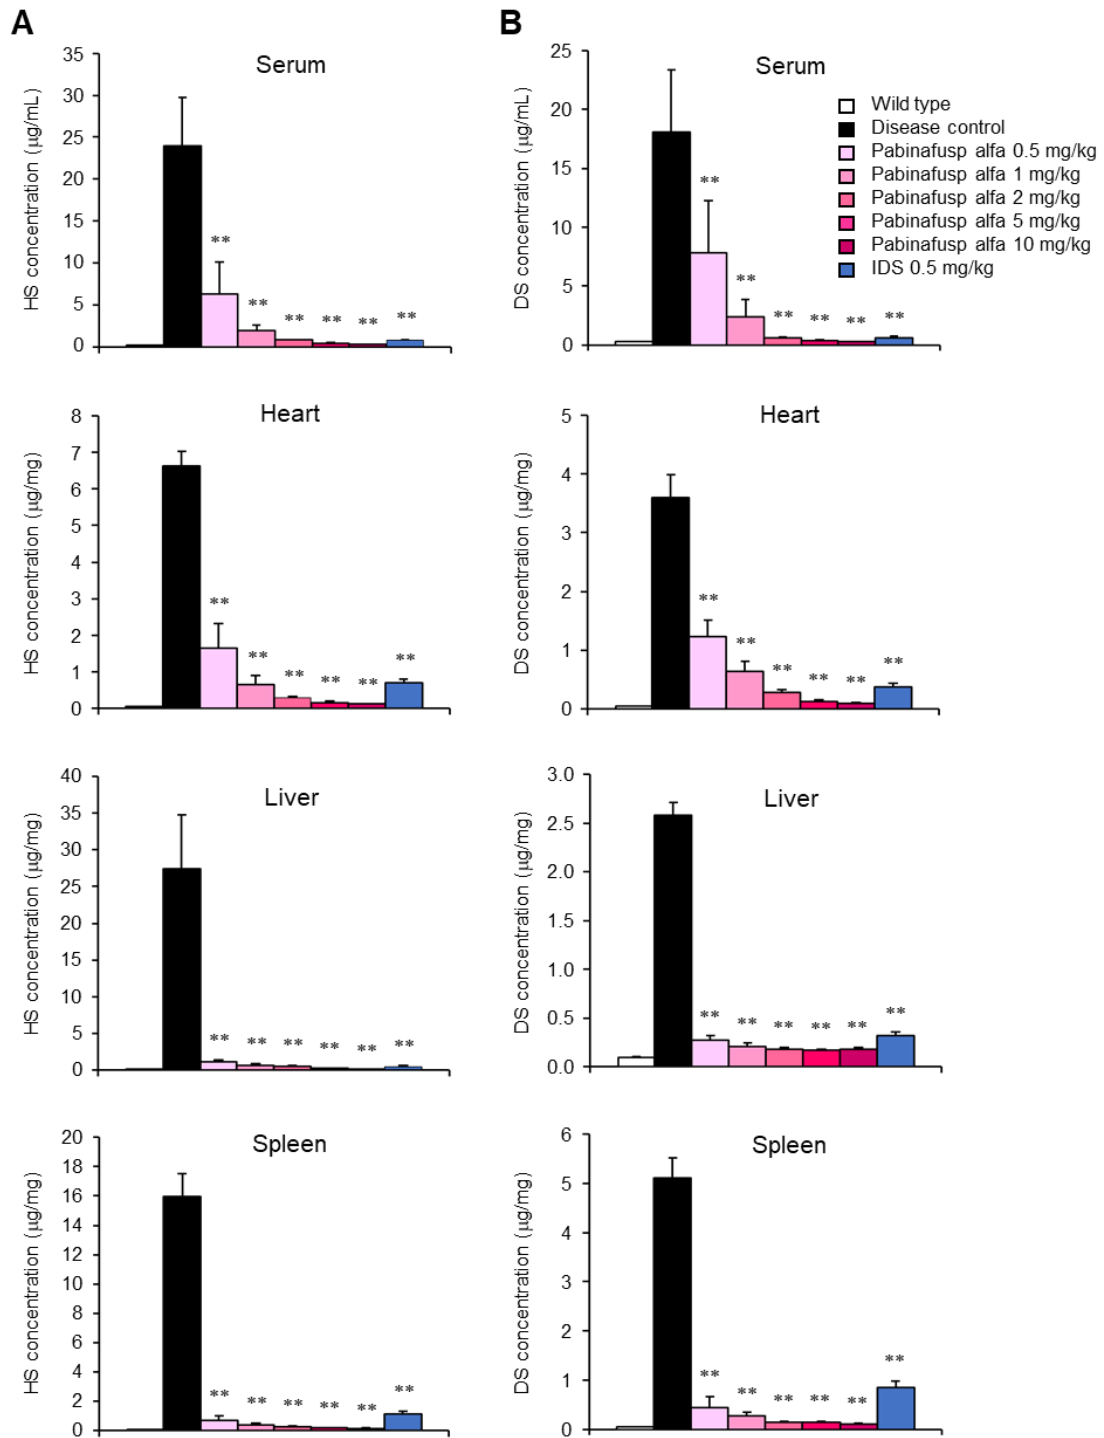

**Figure S2. Concentrations of heparan sulfate and dermatan sulfate in peripheral tissues after a 12-week repeated dose of pabinafusp alfa.** Concentrations of heparan sulfate (HS, A) and dermatan sulfate (DS, B) are shown. Drugs were intravenously administered to 12-week-old MPS II mice once every week for 12 weeks. Values are expressed as mean with S.D. bars. Each group contains 5 animals. \*\* $P < 0.01$  (vs. Disease control group), Tukey-Kramer test.

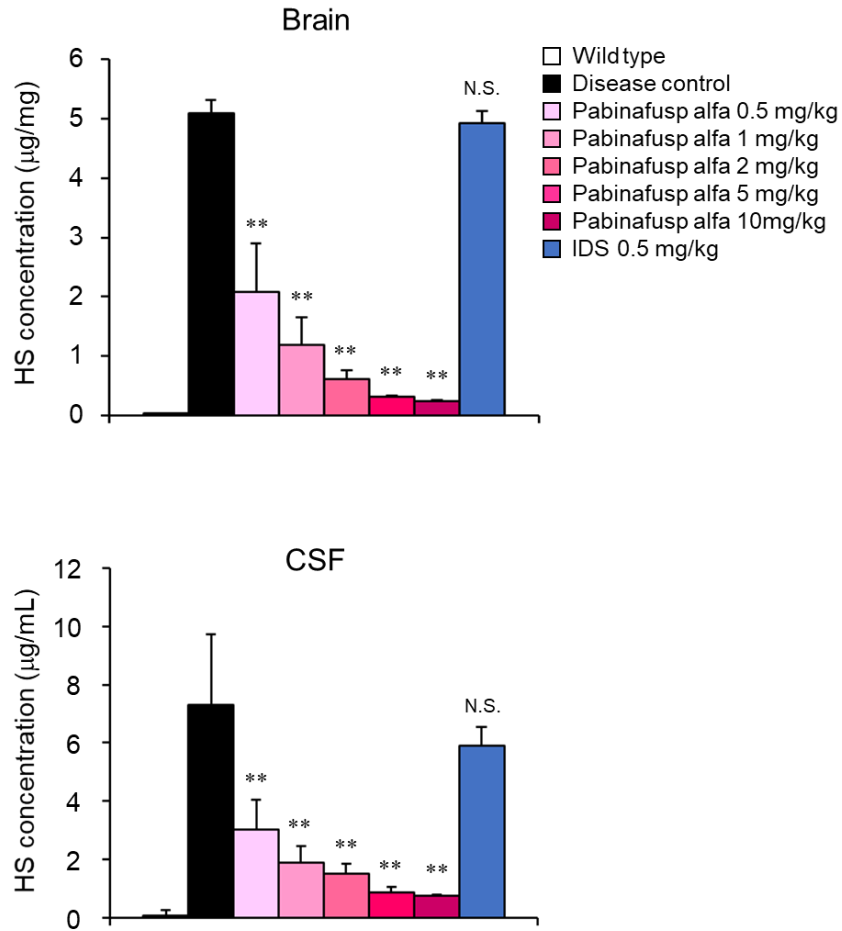

**Figure S3. Concentrations of heparan sulfate in the brain and CSF after 12-week repeated dose of pabinafusp alfa.** Drugs were intravenously administered to 12-week-old MPS II mice once every week for 12 weeks. Values are expressed as mean with S.D. bars. Each group contains 5 animals. \*\* $P < 0.01$ ; N.S., not significant (vs. Disease control group), Tukey-Kramer test.

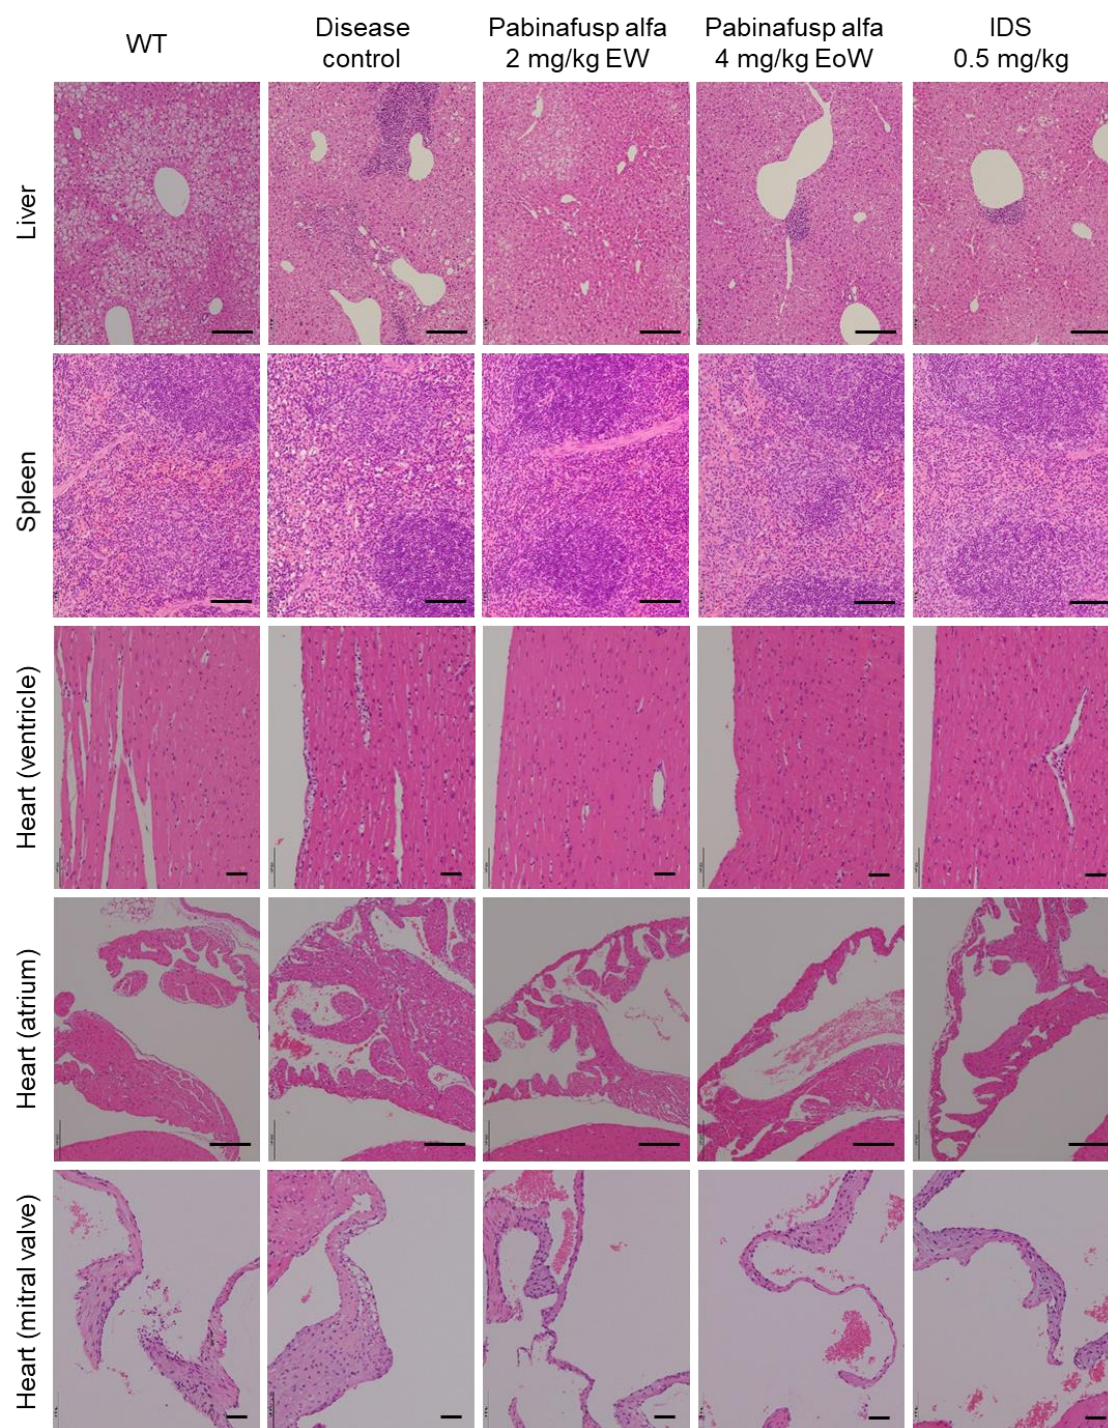

**Figure S4. Histopathological observations in MPS II mice after 36 weeks of treatment with pabinafusp alfa.** Drugs as indicated were intravenously administered to MPS II mice once every week, starting at the age of 10 weeks. Representative photomicrographs of HE staining are shown. Scale bars, 200  $\mu$ m.

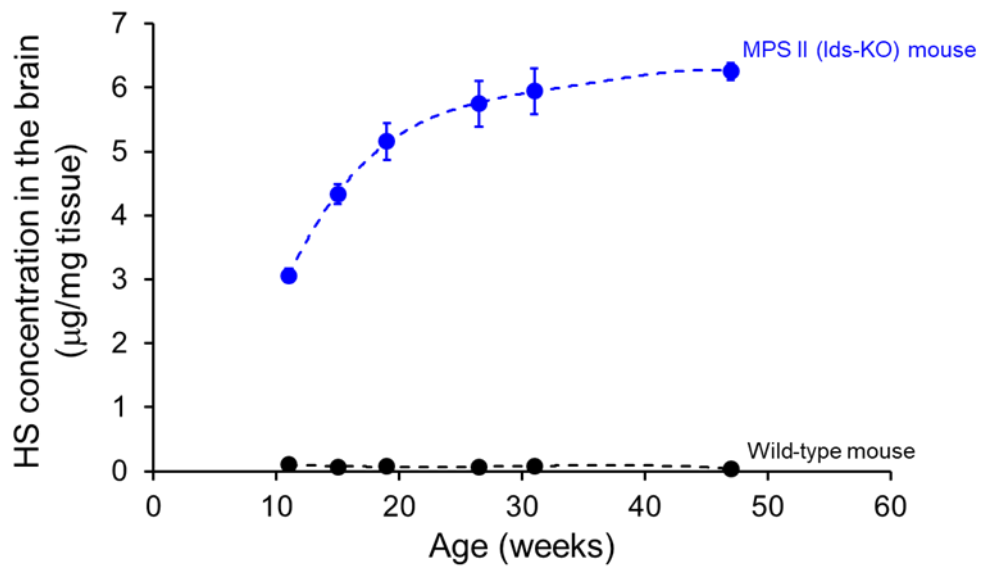

**Figure S5. HS concentration in the brain of MPS II mice.** HS concentrations in the brain were measured at 11, 15, 19, 27, 31, and 47 weeks of age. Values are presented as the mean with S.D. for each group (n = 3-5).

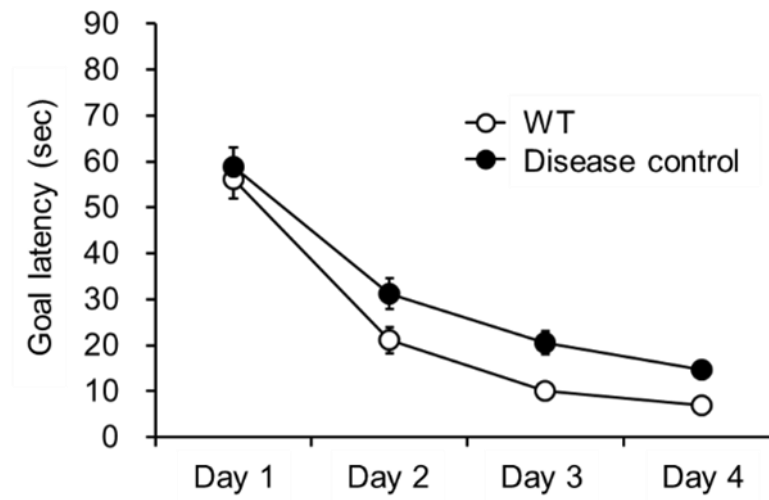

**Figure S6. Spatial learning ability in younger MPS II mice.** Goal latency in the Morris water maze test in 24-week-old MPS II mice. Values are presented as the mean with S.E. for each group (n = 15).







**Table S3. Histopathological changes in MPS II mice at different ages**

| Group           | Age (weeks) | Number of animals | Findings                                                  |   |   |    |     |                                                 |    |   |    |     |                              |   |    |    |     |                                                    |   |   |    |     |                                         |   |   |    |     |   |   |   |   |
|-----------------|-------------|-------------------|-----------------------------------------------------------|---|---|----|-----|-------------------------------------------------|----|---|----|-----|------------------------------|---|----|----|-----|----------------------------------------------------|---|---|----|-----|-----------------------------------------|---|---|----|-----|---|---|---|---|
|                 |             |                   | Deposition, eosinophilic material, pons/medulla oblongata |   |   |    |     | Deposition, eosinophilic material, diencephalon |    |   |    |     | Vacuolization, Purkinje cell |   |    |    |     | Vacuolization, nerve cell, pons/cerebellar medulla |   |   |    |     | Vacuolization, nerve cell, diencephalon |   |   |    |     |   |   |   |   |
|                 |             |                   | -                                                         | ± | + | ++ | +++ | -                                               | ±  | + | ++ | +++ | -                            | ± | +  | ++ | +++ | -                                                  | ± | + | ++ | +++ | -                                       | ± | + | ++ | +++ |   |   |   |   |
| Wild type       | 8           | 5                 | 5                                                         | 0 | 0 | 0  | 0   | 0                                               | 5  | 0 | 0  | 0   | 0                            | 0 | 5  | 0  | 0   | 0                                                  | 0 | 0 | 5  | 0   | 0                                       | 0 | 0 | 0  | 5   | 0 | 0 | 0 | 0 |
| Disease control |             | 5                 | 5                                                         | 0 | 0 | 0  | 0   | 0                                               | 5  | 0 | 0  | 0   | 0                            | 0 | 4  | 1  | 0   | 0                                                  | 0 | 0 | 5  | 0   | 0                                       | 0 | 0 | 0  | 5   | 0 | 0 | 0 | 0 |
| WT              | 31          | 5                 | 5                                                         | 0 | 0 | 0  | 0   | 0                                               | 5  | 0 | 0  | 0   | 0                            | 0 | 5  | 0  | 0   | 0                                                  | 0 | 0 | 5  | 0   | 0                                       | 0 | 0 | 0  | 5   | 0 | 0 | 0 | 0 |
| Disease control |             | 5                 | 0                                                         | 5 | 0 | 0  | 0   | 0                                               | 0  | 3 | 2  | 0   | 0                            | 0 | 0  | 4  | 1   | 0                                                  | 0 | 0 | 4  | 1   | 0                                       | 0 | 0 | 0  | 5   | 0 | 0 | 0 | 0 |
| WT              | 55          | 10                | 10                                                        | 0 | 0 | 0  | 0   | 0                                               | 10 | 0 | 0  | 0   | 0                            | 0 | 10 | 0  | 0   | 0                                                  | 0 | 0 | 10 | 0   | 0                                       | 0 | 0 | 0  | 10  | 0 | 0 | 0 | 0 |
| Disease control |             | 9                 | 0                                                         | 0 | 9 | 0  | 0   | 0                                               | 0  | 0 | 9  | 0   | 0                            | 0 | 0  | 0  | 8   | 1                                                  | 0 | 0 | 2  | 7   | 0                                       | 0 | 0 | 0  | 3   | 3 | 3 | 0 | 0 |

-: negative, ±: minimal, +: mild, ++: moderate, +++: severe
